# Supplementary material for: Inferences from CO 2 and CH 4 concentration profiles at the Zotino Tall Tower Observatory (ZOTTO) on regional summertime ecosystem fluxes
Source: Copernicus journal article supplement (doi:10.5194/bg-11-2055-2014), 2014-04-11
Supplement: Supplementary file 1 [file bg-11-2055-2014-supplement.pdf]

# Inferences from CO<sub>2</sub> and CH<sub>4</sub> concentration profiles at the Zotino Tall Tower Observatory (ZOTTO) on regional summertime ecosystem fluxes

J. Winderlich<sup>1,2</sup>, C. Gerbig<sup>2</sup>, O. Kolle<sup>2</sup>, and M. Heimann<sup>2</sup>

<sup>1</sup>Max Planck Institute for Chemistry, P.O. Box 3060, 55020 Mainz, Germany

<sup>2</sup>Max Planck Institute for Biogeochemistry, P.O. Box 100164, 07701 Jena, Germany

The Figs. S1 to S6 show the average height-resolved diurnal cycles of ZOTTO summer data (June to Sept., 2009-2011).

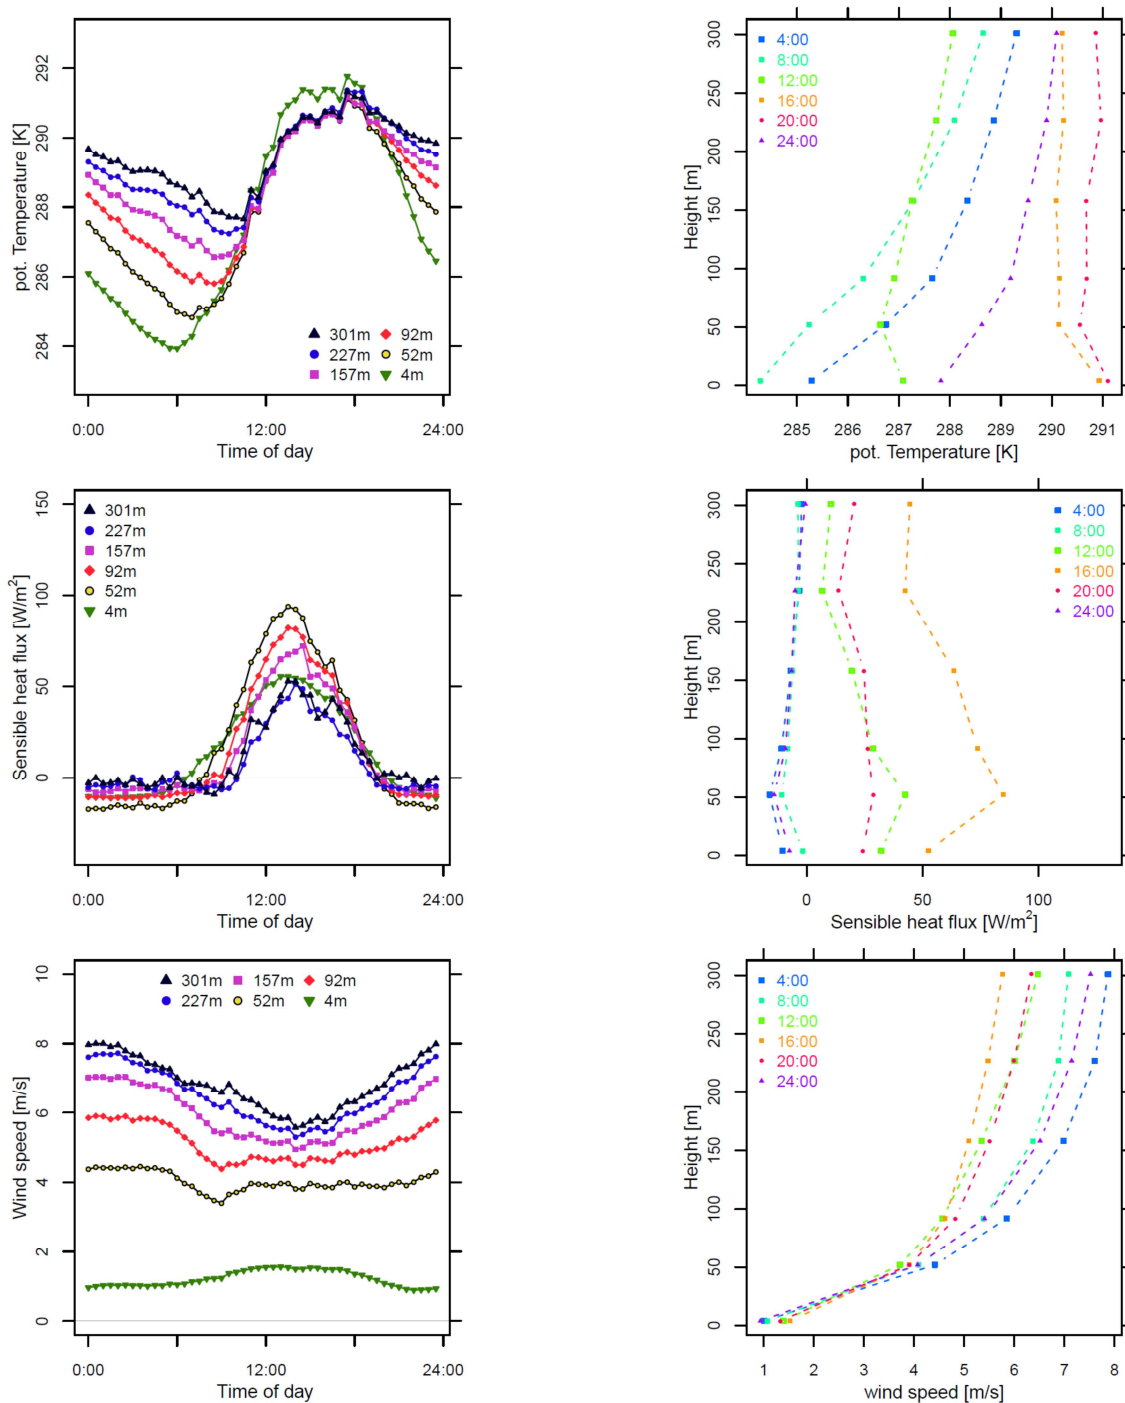

**Fig. S1.** *left:* Average diurnal cycle of potential temperature, sensible heat, and wind speed of all tower heights; *right:* average profile throughout the day

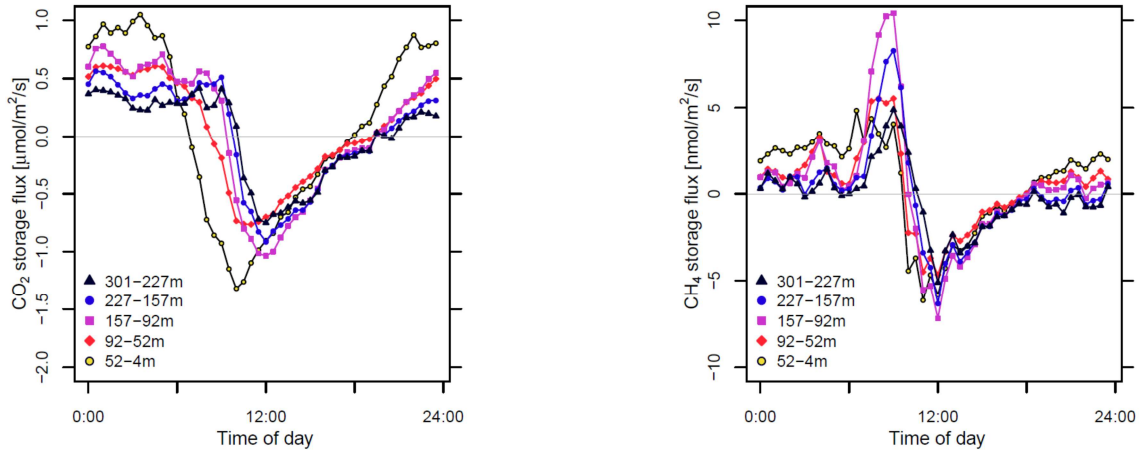

**Fig. S2.** Average diurnal cycle of the storage flux term between all tower levels for CO<sub>2</sub> (left) and CH<sub>4</sub> (right)

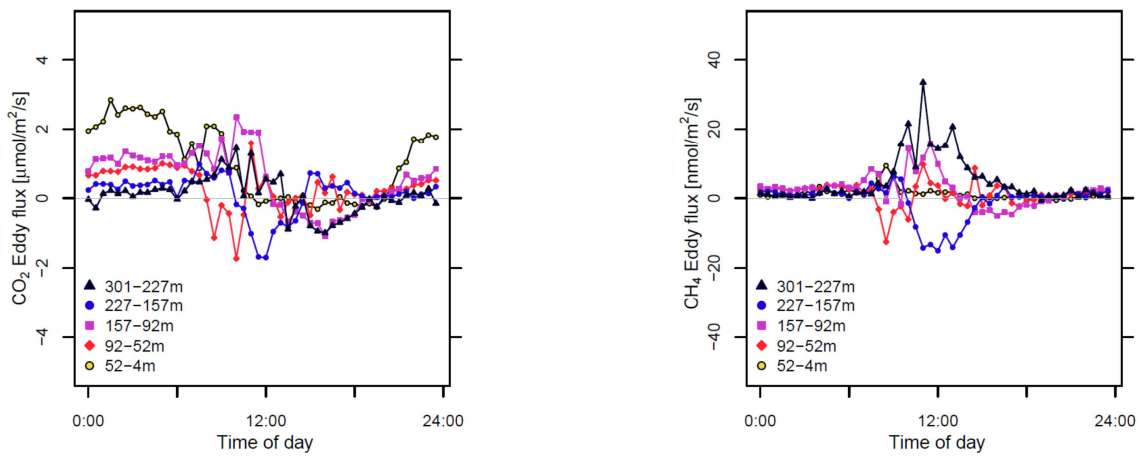

**Fig. S3.** Average diurnal cycle of the eddy flux term between all tower levels for CO<sub>2</sub> (left) and CH<sub>4</sub> (right)

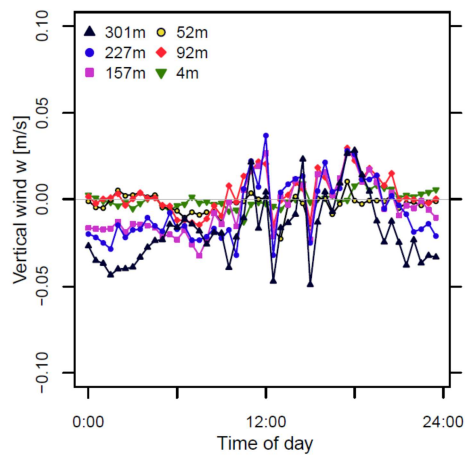

**Fig. S4.** Average diurnal cycle of the vertical wind on all tower levels

Formula for the vertical advection flux (Winderlich, 2012):

$$F_{vAdv} = \overline{w}(z_r) \left( \overline{c}(z_r) - \frac{1}{z_r} \int_0^{z_r} \overline{c}(z) dz \right) = \overline{w}_r (c_r - \langle c \rangle)$$

$\langle c \rangle$  ... average gas concentration within the observed air volume below height  $z_r$

$c_r$  ... concentration of overlaying air in height  $z_r$

$\overline{w}_r$  ... mean vertical wind velocity

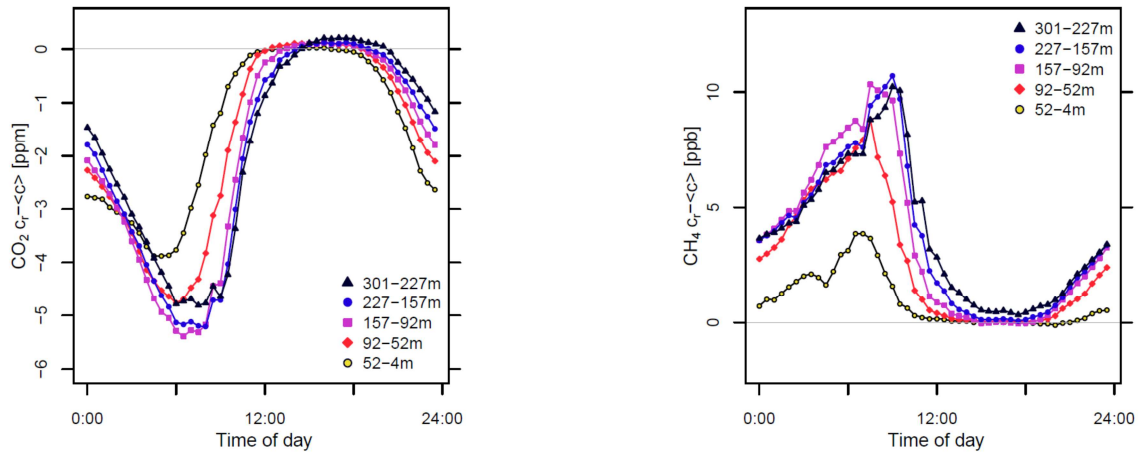

**Fig. S5.** Average diurnal cycle of the advection term ( $c_r - \langle c \rangle$ ) between all tower levels for CO<sub>2</sub> (left) and CH<sub>4</sub> (right)

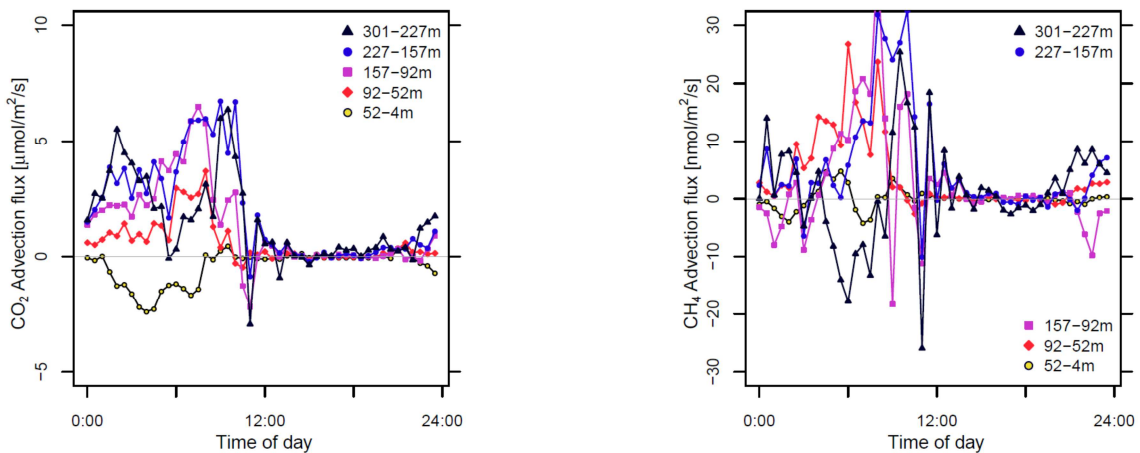

**Fig. S6.** Average diurnal cycle of the advection flux between all tower levels for CO<sub>2</sub> (left) and CH<sub>4</sub> (right)

The ZOTTO data set is available through the ZOTTO consortium.  
Please, find the up-to-date contacts on [www.zottoproject.org](http://www.zottoproject.org).

## References

Winderlich, J.: Setup of a CO<sub>2</sub> and CH<sub>4</sub> measurement system in Central Siberia and modeling of its results, Technical Report Vol. 26, ISSN 1615-7400, Max-Planck-Institut für Biogeochemie, Jena, 2012.
